# Supplementary material for: Unlocking the Sporicidal Potential of Ethanol: Induced Sporicidal Activity of Ethanol against Clostridium difficile and Bacillus Spores under Altered Physical and Chemical Conditions
Source: PLoS One. 2015 Jul 15;10(7):e0132805. doi: 10.1371/journal.pone.0132805 (PMC4503543; doi:10.1371/journal.pone.0132805)
Supplement: S7 File — Raw data and statistical analysis for Fig 7. (XLSX) [file pone.0132805.s007.xlsx]

## Sheet: Sheet1
Human volunteer, acid alcohol
summary
ATCC 43593
						mean	st dev	st error
Soap and water			1.5	1.8	1.4	1.6	0.21	0.1
Ethanol-based hand sanitizer			0.2	0.3	0.2	0.23	0.06	0.04
10% bleach solution			2.9	2.7	2.8	2.8	0.1	0.06
70% ethanol			0.1	0.2	0.1	0.13	0.06	0.04
70% ethanol, pH 1.3			1.7	1.9	2	1.9	0.16	0.09
70% ethanol, pH 1.5			1.3	1.6	1.5	1.5	0.15	0.09
70% ethanol, pH 2.0			0.6	0.5	0.7	0.6	0.1	0.06
70% ethanol, pH 2.0*			1.5	1.3	1.5	1.4	0.12	0.06
Summary for Fig. 7
Soap and water		1.57
Ethanol-based hand sanitizer		0.23
10% bleach solution		2.8
70% ethanol		0.13
70% ethanol, pH 1.3		1.9
70% ethanol, pH 1.5		1.5
70% ethanol, pH 2.0		0.6
70% ethanol, pH 2.0*		1.4
